# Supplementary material for: Cardiac telerehabilitation in a middle-income country: analysis of adherence, effectiveness and cost through a randomized clinical trial
Source: PubMed Central journal article supplement — Eur J Phys Rehabil Med. 2022 May 30;58(4):598–605. doi: 10.23736/S1973-9087.22.07340-3 (PMC9980526; doi:10.23736/s1973-9087.22.07340-3), 2022-05-30
Supplement: Supplementary_Digital_Material1.pdf [file Supplementary_Digital_Material1.pdf]

SUPPLEMENTARY DIGITAL MATERIAL 1

Supplementary Table I.—Participant’s baseline sociodemographic and clinical characteristics by group.

|                                        | Traditional CR<br>N.=26 | Home-CR<br>N.=23 | Total N.=49 |
|----------------------------------------|-------------------------|------------------|-------------|
| <b>Sociodemographic</b>                |                         |                  |             |
| Age (years)                            | 54.81±11.40             | 58.13±8.94       | 56.37±10.3  |
|                                        |                         |                  | 5           |
| Sex (% male)                           | 23 (88.5)               | 19 (82.6)        | 42 (85.71)  |
| Marital status (% married or equiv.)   | 14 (53.8)               | 19 (82.6)        | 33 (67.35)  |
| Work status (% unemployed)             | 13 (50.0)               | 10 (43.5)        | 23 (46.94)  |
| Monthly income (% low) <sup>a</sup>    | 21 (80.76)              | 19 (82.60)       | 30 (61.22)  |
| Education (% low) <sup>b</sup>         | 19 (73)                 | 15 (65.2)        | 34 (69.39)  |
| <b>Clinical</b>                        |                         |                  |             |
| <b>CR indication</b>                   |                         |                  |             |
| PCI                                    | 2 (7.7)                 | 1 (4.3)          | 3 (6.12)    |
| Bypass surgery                         | 1 (3.8)                 | 2 (8.7)          | 3 (6.12)    |
| Myocardial Infarction                  | 23 (88.5)               | 20 (87)          | 43 (87.76)  |
| <b>Risk Stratification to exercise</b> |                         |                  |             |
| Low risk                               | 17 (65.4)               | 16 (69.6)        | 33 (67.35)  |
| Moderate risk                          | 9 (34.6)                | 7 (30.4)         | 16 (32.65)  |
| <b>Risk Factors</b>                    |                         |                  |             |
| BMI (kg/cm <sup>2</sup> )              | 29.41±4.01              | 27.81±3.80       | 28.66±3.91  |
| <b>Abdomen Circumference</b>           |                         |                  |             |
| ≥                                      | 19 (73.1)               | 20 (87)          | 39 (79.6)   |

|          |           |           |           |
|----------|-----------|-----------|-----------|
| <        | 7 (26.9)  | 3 (13)    | 10 (20.4) |
| Diabetes |           |           |           |
| Yes      | 7 (26.9)  | 6 (26.1)  | 13 (26.5) |
| No       | 19 (73.1) | 17 (73.9) | 36 (73.5) |

CR: cardiac rehabilitation; PCI: percutaneous coronary intervention; BMI: Body Mass Index, kg/cm<sup>2</sup>.

Data are presented as mean±SD or frequency (%). No significant difference was observed between the groups (all variables P>0.05; independent t-test).

<sup>a</sup>less than 4 minimum salary per month in Brazil = 3992 Brazilian Reais = 975 USD (reference date 15 July 2019, 1BZR=0.2443USD); <sup>b</sup>did not complete high school; <sup>c</sup> 94 cm for men and 80 cm for women.
