# Supplementary material for: Cardiac telerehabilitation in a middle-income country: analysis of adherence, effectiveness and cost through a randomized clinical trial
Source: PubMed Central journal article supplement — Eur J Phys Rehabil Med. 2022 May 30;58(4):598–605. doi: 10.23736/S1973-9087.22.07340-3 (PMC9980526; doi:10.23736/s1973-9087.22.07340-3), 2022-05-30
Supplement: Supplementary_Digital_Material2.pdf [file Supplementary_Digital_Material2.pdf]

SUPPLEMENTARY DIGITAL MATERIAL 2

Table II.—Functional capacity and risk factors pre-, post-CR and follow-up. Per-protocol and intention-to-treat.

| Variables                    | Group    | Per-protocol                                                                                                                                                   |                 |                   |                      | Intention-to-treat                                                                                                                                                |                 |                    |                      |
|------------------------------|----------|----------------------------------------------------------------------------------------------------------------------------------------------------------------|-----------------|-------------------|----------------------|-------------------------------------------------------------------------------------------------------------------------------------------------------------------|-----------------|--------------------|----------------------|
|                              |          | N                                                                                                                                                              | Pre-CR          | Post-CR(12 weeks) | Follow-up (24 weeks) | n                                                                                                                                                                 | Pre-CR          | Post-CR (12 weeks) | Follow-up (24 weeks) |
| Functional Capacity (meters) | TCR      | 2                                                                                                                                                              | 422.61          | 461.74            | 452.17               | 2                                                                                                                                                                 | 415.77          | 472.69             | 464.23               |
|                              |          | 3                                                                                                                                                              |                 | *                 | *                    | 6                                                                                                                                                                 |                 | *                  | *                    |
|                              |          |                                                                                                                                                                | (372.44-472.78) | (408.01-515.47)   | (403.21-501.14)      |                                                                                                                                                                   | (366.90-464.64) | (421.77-523.62)    | (415.67-512.79)      |
|                              | Home -CR | 1<br>8                                                                                                                                                         | 417.22          | 436.67            | 466.11               | 2<br>3                                                                                                                                                            | 386.52          | 410.44             | 433.48               |
|                              |          | (360.51-473.93)                                                                                                                                                | (375.93-497.40) | (410.76-521.46)   |                      | (334.56-438.48)                                                                                                                                                   | (356.30-464.59) | (381.86-485.11)    |                      |
|                              |          | $F_{within} = 5.413$ ; $p_{within} = 0.006$ ;<br>$power_{within} = 0.832$ ;<br>$F_{between} = 1.238$ ;<br>$p_{between} = 0.296$ ;<br>$power_{between} = 0.262$ |                 |                   |                      | $F_{within} = 9.733$ ;<br>$p_{within} < 0.001$ ;<br>$power_{within} = 0.980$ ;<br>$F_{between} = 1.283$ ;<br>$p_{between} = 0.283$ ;<br>$power_{between} = 0.272$ |                 |                    |                      |

|                        |             |                     |                                                                                                                                                                                               |                         |                         |                         |                                                                                                                                                                                              |                         |                         |
|------------------------|-------------|---------------------|-----------------------------------------------------------------------------------------------------------------------------------------------------------------------------------------------|-------------------------|-------------------------|-------------------------|----------------------------------------------------------------------------------------------------------------------------------------------------------------------------------------------|-------------------------|-------------------------|
| BP systolic<br>(mmHg)  | TCR         | 2                   | 114.69                                                                                                                                                                                        | 112.08                  | 118.65                  | 2                       | 112.62                                                                                                                                                                                       | 110.70                  | 116.50                  |
|                        |             | 3                   |                                                                                                                                                                                               |                         |                         | 6                       |                                                                                                                                                                                              |                         | 0                       |
|                        |             |                     | (108.19-<br>120.20)                                                                                                                                                                           | (105.53<br>-<br>118.64) | (109.57<br>-<br>127.73) |                         | (106.52<br>-<br>118.78)                                                                                                                                                                      | (104.81<br>-<br>116.58) | (108.40<br>-<br>124.60) |
|                        | Home<br>-CR | 1<br>9              | 108.42                                                                                                                                                                                        | 110                     | 105.26                  | 2<br>3                  | 108.26                                                                                                                                                                                       | 109.13                  | 105.22                  |
|                        |             | (101.26-<br>115.60) | (102.79<br>-<br>117.21)                                                                                                                                                                       | (95.27-<br>115.25)      |                         | (101.92<br>-<br>114.60) | (102.87<br>-<br>115.39)                                                                                                                                                                      | (95.60-<br>113.83)      |                         |
|                        |             |                     | F <sub>within</sub> =0.043; p <sub>within</sub> =0.938;<br>power <sub>within</sub> =0.056<br>F <sub>between</sub> = 1.688;<br>p <sub>between</sub> =0.191;<br>power <sub>between</sub> =0.346 |                         |                         |                         | F <sub>within</sub> =0.63; p <sub>within</sub> =0.916;<br>power <sub>within</sub> =0.059<br>F <sub>between</sub> = 1.762;<br>p <sub>between</sub> =0.182;<br>power <sub>between</sub> =0.333 |                         |                         |
| BP diastolic<br>(mmHg) | TCR         | 2                   | 70.00                                                                                                                                                                                         | 70.43                   | 69.52                   | 2                       | 68.85                                                                                                                                                                                        | 69.23                   | 68.42                   |
|                        |             | 3                   |                                                                                                                                                                                               |                         |                         | 6                       |                                                                                                                                                                                              |                         |                         |
|                        |             |                     | (66.42-<br>73.59)                                                                                                                                                                             | (66.51-<br>74.36)       | (66.16-<br>72.89)       |                         | (65.53-<br>72.17)                                                                                                                                                                            | (65.23-<br>74.36)       | (66.16-<br>72.89)       |
|                        | Home<br>-CR | 1<br>9              | 69.47                                                                                                                                                                                         | 71.05                   | 65.26                   | 2<br>3                  | 68.70                                                                                                                                                                                        | 71.30                   | 65.65                   |
|                        |             | (65.52-<br>73.42)   | (66.73-<br>75.37)                                                                                                                                                                             | (61.56-<br>68.96)       |                         | (65.17-<br>72.22)       | (67.41-<br>75.20)                                                                                                                                                                            | (62.26-<br>69.05)       |                         |
|                        |             |                     | F <sub>within</sub> =2.522; p <sub>within</sub> =0.087;<br>power <sub>within</sub> =0.492                                                                                                     |                         |                         |                         | F <sub>within</sub> =2.522; p <sub>within</sub> =0.087;<br>power <sub>within</sub> =0.492                                                                                                    |                         |                         |

|                                 |             |        |                                                                                                                                                                                                     |                    |                    |        |                                                                                                                                                                                                     |                    |                    |
|---------------------------------|-------------|--------|-----------------------------------------------------------------------------------------------------------------------------------------------------------------------------------------------------|--------------------|--------------------|--------|-----------------------------------------------------------------------------------------------------------------------------------------------------------------------------------------------------|--------------------|--------------------|
|                                 |             |        | $F_{\text{between}}= 1.387;$<br>$p_{\text{between}}=0.256;$<br>$\text{power}_{\text{between}}=0.290$                                                                                                |                    |                    |        | $F_{\text{between}}= 1.387;$<br>$p_{\text{between}}=0.256;$<br>$\text{power}_{\text{between}}=0.290$                                                                                                |                    |                    |
| Waist<br>Circumference (c<br>m) | TCR         | 1<br>6 | 101.56                                                                                                                                                                                              | 100.94             | 100.53             | 2<br>6 | 100.42                                                                                                                                                                                              | 97.96              | 99.21              |
|                                 |             |        | (96.34-<br>106.77)                                                                                                                                                                                  | (95.41-<br>106.42) | (94.71-<br>106.42) |        | (96.57-<br>104.26)                                                                                                                                                                                  | (95.89-<br>104.11) | (95.43-<br>103.99) |
|                                 | Home<br>-CR | 1<br>6 | 96.06                                                                                                                                                                                               | 95.94              | 96.88              | 2<br>3 | 97.96                                                                                                                                                                                               | 97.52              | 98.17              |
|                                 |             |        | (90.85-<br>101.28)                                                                                                                                                                                  | (90.41-<br>101.46) | (91.02-<br>102.73) |        | (94.03-<br>101.88)                                                                                                                                                                                  | (93.33-<br>101.72) | (93.80-<br>102.55) |
|                                 |             |        | $F_{\text{within}}=0.183; p_{\text{within}}=0.833;$<br>$\text{power}_{\text{within}}=0.077$<br>$F_{\text{between}}= 1.053;$<br>$p_{\text{between}}=0.355;$<br>$\text{power}_{\text{between}}=0.226$ |                    |                    |        | $F_{\text{within}}=0.426; p_{\text{within}}=0.655;$<br>$\text{power}_{\text{within}}=0.117$<br>$F_{\text{between}}= 3.422;$<br>$p_{\text{between}}=0.510;$<br>$\text{power}_{\text{between}}=0.161$ |                    |                    |
| Glucose (mg/dL)                 | TCR         | 1<br>5 | 120.40                                                                                                                                                                                              | 108.20             | 105.40             | 1<br>9 | 115.42                                                                                                                                                                                              | 106.00             | 103.79             |
|                                 |             |        | (102.82-<br>137.98)                                                                                                                                                                                 | (97.84-<br>118.56) | (95.31-<br>115.49) |        | (101.13<br>-<br>129.72)                                                                                                                                                                             | (97.56-<br>114.49) | (95.65-<br>111.93) |
|                                 | Home<br>-CR | 1<br>3 | 109.15                                                                                                                                                                                              | 107.39             | 115.15             | 1<br>6 | 108.56                                                                                                                                                                                              | 105.94             | 113.44             |

|                           |         |    |                                                                                                                                                                                                           |                 |                 |    |                                                                                                                                                                                                           |                 |                 |
|---------------------------|---------|----|-----------------------------------------------------------------------------------------------------------------------------------------------------------------------------------------------------------|-----------------|-----------------|----|-----------------------------------------------------------------------------------------------------------------------------------------------------------------------------------------------------------|-----------------|-----------------|
|                           |         |    | (90.27-128.04)                                                                                                                                                                                            | (96.26-118.51)  | (104.31-125.10) |    | (92.98-124.14)                                                                                                                                                                                            | (96.74-115.13)  | (104.57-122.30) |
|                           |         |    | $F_{\text{within}}=0.936$ ; $p_{\text{within}}=0.369$ ;<br>$\text{power}_{\text{within}}=0.174$<br>$F_{\text{between}}= 2.058$ ;<br>$p_{\text{between}}=0.155$ ;<br>$\text{power}_{\text{between}}=0.331$ |                 |                 |    | $F_{\text{within}}=1.035$ ; $p_{\text{within}}=0.339$ ;<br>$\text{power}_{\text{within}}=0.223$<br>$F_{\text{between}}= 1.953$ ;<br>$p_{\text{between}}=0.165$ ;<br>$\text{power}_{\text{between}}=0.320$ |                 |                 |
| Cholesterol total (mg/dL) | TCR     | 19 | 153.74                                                                                                                                                                                                    | 211.79          | 144.89          | 24 | 150.54                                                                                                                                                                                                    | 193.67          | 140.71          |
|                           |         |    | (127.76-179.71)                                                                                                                                                                                           | (120.66-302.95) | (129.39-160.38) |    | (130.17-170.92)                                                                                                                                                                                           | (123.66-263.67) | 127.65-153.77)  |
|                           | Home-CR | 14 | 160.36                                                                                                                                                                                                    | 138.07          | 140.07          | 20 | 158.35                                                                                                                                                                                                    | 142.70          | 142.00          |
|                           |         |    | (130.10-190.61)                                                                                                                                                                                           | (118.53-161.60) | (122.01-158.13) |    | (136.03-180.67)                                                                                                                                                                                           | (101.69-190.39) | (127.69-156.31) |
|                           |         |    | $F_{\text{within}}=0.606$ ; $p_{\text{within}}=0.457$ ;<br>$\text{power}_{\text{within}}=0.121$<br>$F_{\text{between}}= 1.084$ ;<br>$p_{\text{between}}=0.312$ ;<br>$\text{power}_{\text{between}}=0.179$ |                 |                 |    | $F_{\text{within}}=0.744$ ; $p_{\text{within}}=0.406$ ;<br>$\text{power}_{\text{within}}=0.139$<br>$F_{\text{between}}= 1.072$ ;<br>$p_{\text{between}}=0.313$ ;<br>$\text{power}_{\text{between}}=0.180$ |                 |                 |

\*P<0.05 compared to pre-CR e \*\*P<0.05 after 3 months (24 weeks) compared with post intervention (12 weeks). by mixed factor ANOVA test.

TCR: traditional cardiac rehabilitation; CR: cardiac rehabilitation; BP: blood pressure (mmHg). Data are presented as mean (CI 95%).
