# Supplementary material for: Cardiac telerehabilitation in a middle-income country: analysis of adherence, effectiveness and cost through a randomized clinical trial
Source: PubMed Central journal article supplement — Eur J Phys Rehabil Med. 2022 May 30;58(4):598–605. doi: 10.23736/S1973-9087.22.07340-3 (PMC9980526; doi:10.23736/s1973-9087.22.07340-3), 2022-05-30
Supplement: Supplementary_Digital_Material3.pdf [file Supplementary_Digital_Material3.pdf]

SUPPLEMENTARY DIGITAL MATERIAL 3

Table III.—Quality of Life and health behaviors pre-, post-CR and at follow-up. Per-protocol and Intention-to-treat.

| Variables                         | Group   | Per protocol |                                                                                                                                                                                             |                    |                      | Intention-to-treat |                                                                                                                                                                                                   |                    |                      |
|-----------------------------------|---------|--------------|---------------------------------------------------------------------------------------------------------------------------------------------------------------------------------------------|--------------------|----------------------|--------------------|---------------------------------------------------------------------------------------------------------------------------------------------------------------------------------------------------|--------------------|----------------------|
|                                   |         | n            | Pre-CR                                                                                                                                                                                      | Post-CR (12 weeks) | Follow-up (24 weeks) | n                  | Pre-CR                                                                                                                                                                                            | Post-CR (12 weeks) | Follow-up (24 weeks) |
| Quality of life (physical health) | TCR     | 18           | 67.61                                                                                                                                                                                       | 75.32*             | 71.28***             | 26                 | 69.51                                                                                                                                                                                             | 76.11*             | 73.31***             |
|                                   |         |              | (58.33-76.89)                                                                                                                                                                               | (66.89-83.75)      | (61.61-80.95)        |                    | (61.36-77.66)                                                                                                                                                                                     | (69.04-83.17)      | (65.50-81.12)        |
|                                   | Home-CR | 19           | 61.35                                                                                                                                                                                       | 72.78*             | 67.55***             | 23                 | 60.75                                                                                                                                                                                             | 70.87*             | 66.55***             |
|                                   |         |              | (52.32-70.38)                                                                                                                                                                               | (65.57-80.97)      | (58.13-76.97)        |                    | (52.08-69.41)                                                                                                                                                                                     | (63.36-78.38)      | (58.25-74.86)        |
|                                   |         |              | F <sub>within</sub> =10.264; p <sub>within</sub> <0.001;<br>power <sub>within</sub> =0.960<br>F <sub>between</sub> = 0.405; p <sub>between</sub> =0.619;<br>power <sub>between</sub> =0.106 |                    |                      |                    | F <sub>within</sub> =12.247;<br>p <sub>within</sub> <0.001;<br>power <sub>within</sub> =0.982<br>F <sub>between</sub> = 0.545;<br>p <sub>between</sub> =0.536;<br>power <sub>between</sub> =0.126 |                    |                      |
| Quality of life (mental health)   | TCR     | 18           | 76.53                                                                                                                                                                                       | 79.89*             | 81.28*               | 26                 | 75.85                                                                                                                                                                                             | 78.75*             | 79.71*               |
|                                   |         |              | (68.46-84.59)                                                                                                                                                                               | (72.76-87.02)      | (73.62-88.93)        |                    | (68.45-83.26)                                                                                                                                                                                     | (72.17-85.33)      | (72.82-86.60)        |

|                                  |             |                                                                                                                                                                                                          |                   |                   |                   |                                                                                                                                                                                                                |                   |                   |                   |
|----------------------------------|-------------|----------------------------------------------------------------------------------------------------------------------------------------------------------------------------------------------------------|-------------------|-------------------|-------------------|----------------------------------------------------------------------------------------------------------------------------------------------------------------------------------------------------------------|-------------------|-------------------|-------------------|
|                                  | Home-<br>CR | 19                                                                                                                                                                                                       | 71.48             | 78.98*            | 78.85*            | 23                                                                                                                                                                                                             | 69.60             | 76.62*            | 76.52*            |
|                                  |             |                                                                                                                                                                                                          | (63.63-<br>79.33) | (72.04-<br>85.91) | (71.39-<br>86.30) |                                                                                                                                                                                                                | (61.72-<br>77.47) | (69.63-<br>83.62) | (69.20-<br>83.84) |
|                                  |             | $F_{\text{within}}=5.540$ ; $p_{\text{within}}=0.006$ ;<br>$\text{power}_{\text{within}}=0.839$<br>$F_{\text{between}}= 0.545$ ; $p_{\text{between}}=0.583$ ;<br>$\text{power}_{\text{between}}=0.137$   |                   |                   |                   | $F_{\text{within}}=7.467$ ; $p_{\text{within}}=0.001$ ;<br>$\text{power}_{\text{within}}=0.936$<br>$F_{\text{between}}= 0.957$ ;<br>$p_{\text{between}}=0.388$ ;<br>$\text{power}_{\text{between}}=0.212$      |                   |                   |                   |
| Functional<br>Capacity<br>(DASI) | TCR         | 23                                                                                                                                                                                                       | 41.39             | 48.07*            | 45.96*            | 26                                                                                                                                                                                                             | 40.88             | 48.23*            | 46.39*            |
|                                  |             |                                                                                                                                                                                                          | (36.76-<br>46.00) | (44.09-<br>52.05) | (41.09-<br>50.88) |                                                                                                                                                                                                                | (36.30-<br>45.46) | (44.51-<br>51.94) | (41.93-<br>50.84) |
|                                  | Home-<br>CR | 19                                                                                                                                                                                                       | 38.41             | 45.09*            | 44.30*            | 23                                                                                                                                                                                                             | 37.01             | 43.54*            | 42.89*            |
|                                  |             |                                                                                                                                                                                                          | (33.33-<br>43.49) | (40.72-<br>49.47) | (38.92-<br>49.70) |                                                                                                                                                                                                                | (32.14-<br>41.88) | (39.59-<br>47.49) | (38.15-<br>47.63) |
|                                  |             | $F_{\text{within}}=10.206$ ; $p_{\text{within}}=<0.001$ ;<br>$\text{power}_{\text{within}}=0.984$<br>$F_{\text{between}}= 0.115$ ; $p_{\text{between}}=0.891$ ;<br>$\text{power}_{\text{between}}=0.067$ |                   |                   |                   | $F_{\text{within}}=14.258$ ;<br>$p_{\text{within}}=<0.001$ ;<br>$\text{power}_{\text{within}}=0.994$<br>$F_{\text{between}}= 0.097$ ;<br>$p_{\text{between}}=0.867$ ;<br>$\text{power}_{\text{between}}=0.063$ |                   |                   |                   |
|                                  | TCR         | 23                                                                                                                                                                                                       | 13.91             | 15.22*            | 15.17*            | 26                                                                                                                                                                                                             | 13.69             | 15.23*            | 15.19*            |

|                         |             |                                                                                                                                                                                             |                   |                   |                   |                                                                                                                                                                                                   |                   |                   |                   |
|-------------------------|-------------|---------------------------------------------------------------------------------------------------------------------------------------------------------------------------------------------|-------------------|-------------------|-------------------|---------------------------------------------------------------------------------------------------------------------------------------------------------------------------------------------------|-------------------|-------------------|-------------------|
| Knowledge<br>(CADEQ-SV) |             |                                                                                                                                                                                             | (13.04-<br>14.78) | (14.45-<br>15.97) | (14.42-<br>15.93) |                                                                                                                                                                                                   | (12.86-<br>14.53) | (14.52-<br>15.95) | (14.50-<br>15.89) |
|                         | Home-<br>CR | 20                                                                                                                                                                                          | 13.80             | 15.35*            | 15.80*            | 23                                                                                                                                                                                                | 13.19             | 15.57*            | 15.96*            |
|                         |             |                                                                                                                                                                                             | (12.87-<br>14.73) | (14.53-<br>16.17) | (14.99-<br>16.60) |                                                                                                                                                                                                   | (13.03-<br>14.80) | (14.80-<br>16.33) | (15.22-<br>16.69) |
|                         |             | F <sub>within</sub> =19.793; p <sub>within</sub> <0.001;<br>power <sub>within</sub> =1.000<br>F <sub>between</sub> = 0.843; p <sub>between</sub> =0.364;<br>power <sub>between</sub> =0.190 |                   |                   |                   | F <sub>within</sub> =25.532;<br>p <sub>within</sub> <0.001;<br>power <sub>within</sub> =1.000<br>F <sub>between</sub> = 0.551;<br>p <sub>between</sub> =0.550;<br>power <sub>between</sub> =0.131 |                   |                   |                   |

\*P<0.05 compared to pre-CR e \*\*P<0.05 follow-up compared to post-CR by mixed factor ANOVA test.

TCR: traditional cardiac rehabilitation; CR: cardiac rehabilitation; DASI: Duke Activity Status Index Score; CADEQ-SV: Coronary Artery Disease Education Questionnaire-Short Version. Data are presented as mean (CI 95%).
