# Supplementary material for: Cardiac telerehabilitation in a middle-income country: analysis of adherence, effectiveness and cost through a randomized clinical trial
Source: PubMed Central journal article supplement — Eur J Phys Rehabil Med. 2022 May 30;58(4):598–605. doi: 10.23736/S1973-9087.22.07340-3 (PMC9980526; doi:10.23736/s1973-9087.22.07340-3), 2022-05-30
Supplement: Supplementary_Digital_Material4.pdf [file Supplementary_Digital_Material4.pdf]

SUPPLEMENTARY DIGITAL MATERIAL 4

Supplementary Table IV. □ Description of the service cost per participant to deliver the two models of CR.

| Expenses                                              | Traditional CR<br>(Brazilian R\$/US\$) | Home-CR<br>(Brazilian R\$/US\$) |
|-------------------------------------------------------|----------------------------------------|---------------------------------|
| Health professionals to deliver in person CR sessions | 397.20/97.05                           | 33.10/8.09                      |
| Electric power for treadmill                          | 12.72/3.11                             | 1.06/0.26                       |
| Equipment maintenance                                 | 7.20/1.76                              | 0.6/0.15                        |
| Heart rate monitor                                    | 4.09/0.99                              | 23.05/5.63                      |
| Glucose meter and test strips                         | 131.52/32.13                           | 2.67/0.65                       |
| Phone calls                                           | ---                                    | 1.20/0.30                       |
| Health professional to realize phone calls            | ----                                   | 42.21                           |
| Total:                                                | 552.73/135.05                          | 242.72/59.31                    |

CR: cardiac rehabilitation; R\$: Brazilian Reais; US\$: reference date 15 July 2019 (1R\$= 0.2443US\$).
